# Supplementary material for: Theoretical study of protein adsorption on graphene/h-BN heterostructures
Source: Royal Society of Chemistry journal article supplement (doi:10.1039/d3cp03303a), 2023-01-01
Supplement: d3cp03303a1.pdf [file d3cp03303a1.pdf]

# Supporting Information

## Theoretical study of protein adsorption on graphene/h-BN heterostructures

Jun Lan<sup>a</sup>, Yiran Peng<sup>a</sup>, Lijun Liang<sup>a,\*</sup>, Xing Duan<sup>b</sup>, Zhe Kong<sup>b</sup>, Li Zhang<sup>c</sup>, Jia-Wei Shen<sup>d,e,\*</sup>

<sup>a</sup>College of Automation, Hangzhou Dianzi University, Hangzhou, 310018, China

<sup>b</sup>Center of Advanced Optoelectronic Materials and Devices, Key Laboratory of Novel Materials for Sensor of Zhejiang Province, College of Materials and Environmental Engineering, Hangzhou Dianzi University, Hangzhou, 310018, China

<sup>c</sup>Department of Chemistry, Key Laboratory of Surface & Interface Science of Polymer Materials of Zhejiang Province. Zhejiang Sci-Tech University, Hangzhou, 310018, China

<sup>d</sup>School of Pharmacy, Hangzhou Normal University, Hangzhou, Zhejiang 311121, China.

<sup>e</sup>Key Laboratory of Elemene Class Anti-Cancer Chinese Medicines; Engineering Laboratory of Development and Application of Traditional Chinese Medicines; Collaborative Innovation Center of Traditional Chinese Medicines of Zhejiang Province, Hangzhou Normal University, Hangzhou, Zhejiang 311121, China.

\* Corresponding authors.

E-mail :

michael.lijunl@gmail.com (L.J. Liang)

shen.jiawei@hotmail.com (J.-W. Shen)

## Note 1. Force field parameters of GRA and h-BN

C atoms in GRA and B and N atoms in h-BN are all constructed as Lennard-Jones particles. Lennard-Jones parameters of C, B and N atoms are taken from previous groups<sup>[1-3]</sup>:  $\sigma_{C-C}=0.3580$  nm,  $\epsilon_{C-C}=0.277399$  kJ/mol,  $\sigma_{B-B}=0.3453$  nm,  $\epsilon_{B-B}=0.397133$  kJ/mol,  $\sigma_{N-N}=0.3365$  nm,  $\epsilon_{N-N}=0.606024$  kJ/mol.

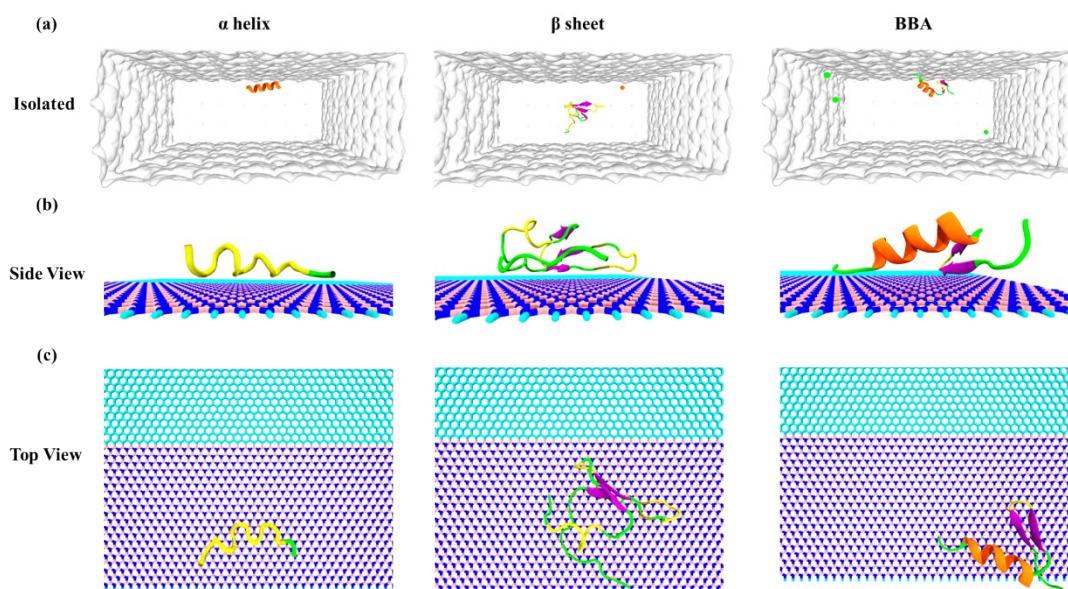

Figure S1. The initial simulated conformations of three protein in separated aqueous solutions: (a) isolated. The final conformation of orientation 1 of each protein after 200 ns MD simulation: (b) side view. (c) top view. The water molecules are implicitly expressed as gray surfaces. The protein molecules were setained according to the secondary structure, with the  $\alpha$ -helix in orange,  $\beta$ -sheet in purple,  $\beta$ -bridge in tan, coil in green, turn in yellow, and ions (represented by balls) stained according to the element type ( $\text{Na}^+$ : orange,  $\text{Cl}^-$ : green). Herein, the  $\alpha$  helix in the first column represents  $\lambda_{2-16}$  protein, the  $\beta$  sheet in the second column represents WW domain protein, and the last column represents BBA protein. For the clarity, no water molecule was shown (b) and (c).

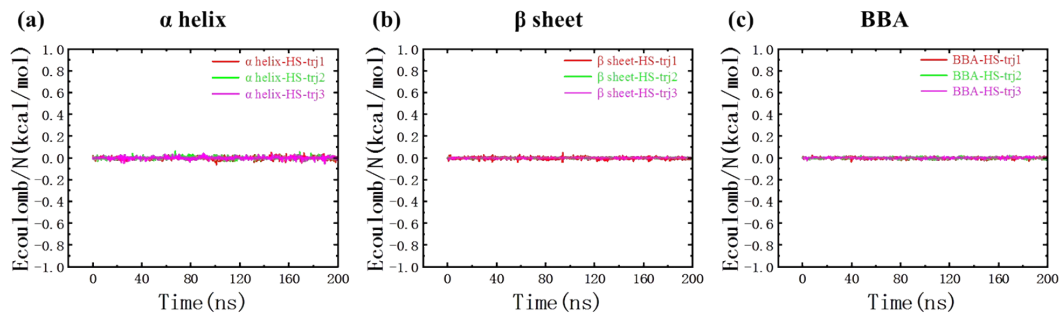

Figure S2. Coulomb interaction between three protein and GRA/h-BN heterojunction (average to per contact residue): (a)  $\lambda_{2-16}$  protein. (b) WW domain protein. (c) BBA protein.

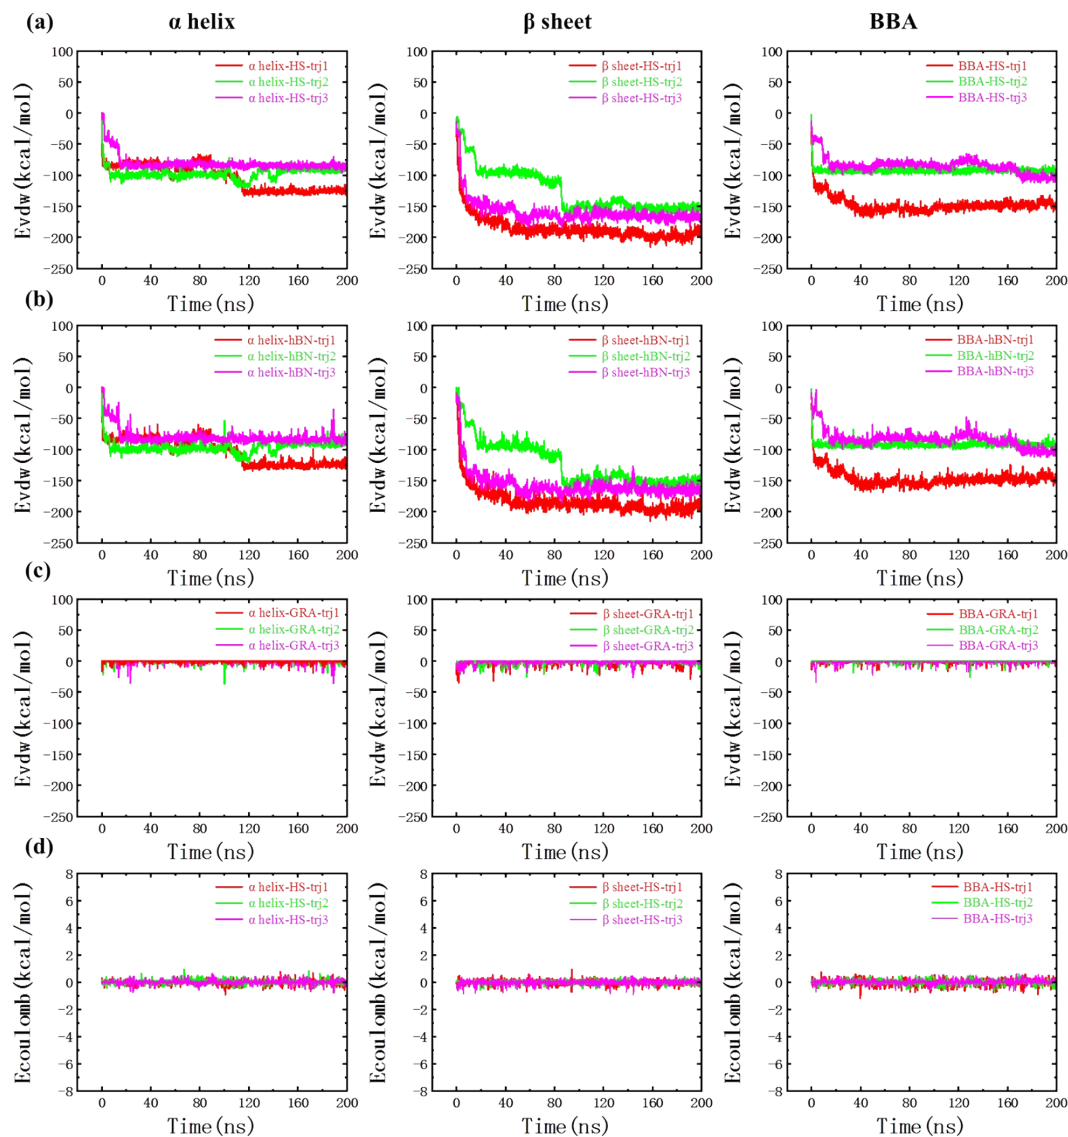

Figure S3. The total vdW and Coulomb interaction energies of all residues of three protein species with GRA/h-BN: (a) the vdW interaction between protein and the

whole heterojunction plane (HS stands for the whole heterojunction plane). (b) the vdW interaction between protein and hBN region of heterojunction. (c) the vdW interaction between protein and GRA region of heterojunction. (d) the Coulomb interaction between protein and the whole heterojunction plane. Herein, the  $\alpha$  helix in the first column represents  $\lambda 2-16$  protein, the  $\beta$  sheet in the second column represents WW domain protein, and the last column represents BBA protein.

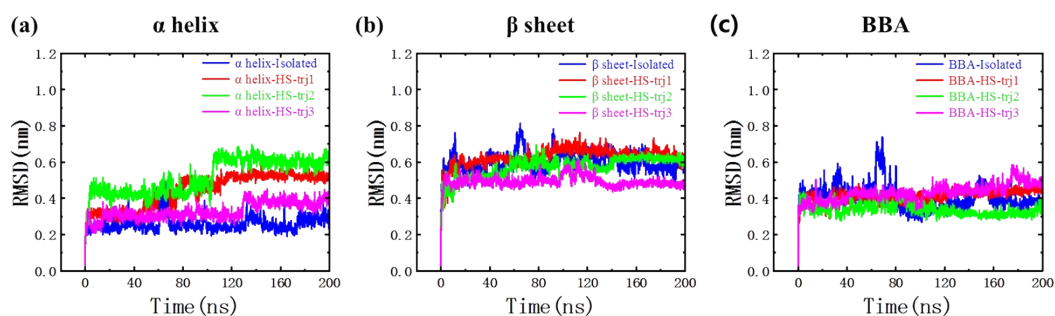

Figure S4. The evolution of three protein root mean square deviation (RMSD) with time in the simulation process: (a)  $\lambda 2-16$  protein. (b) WW domain protein. (c) BBA protein.

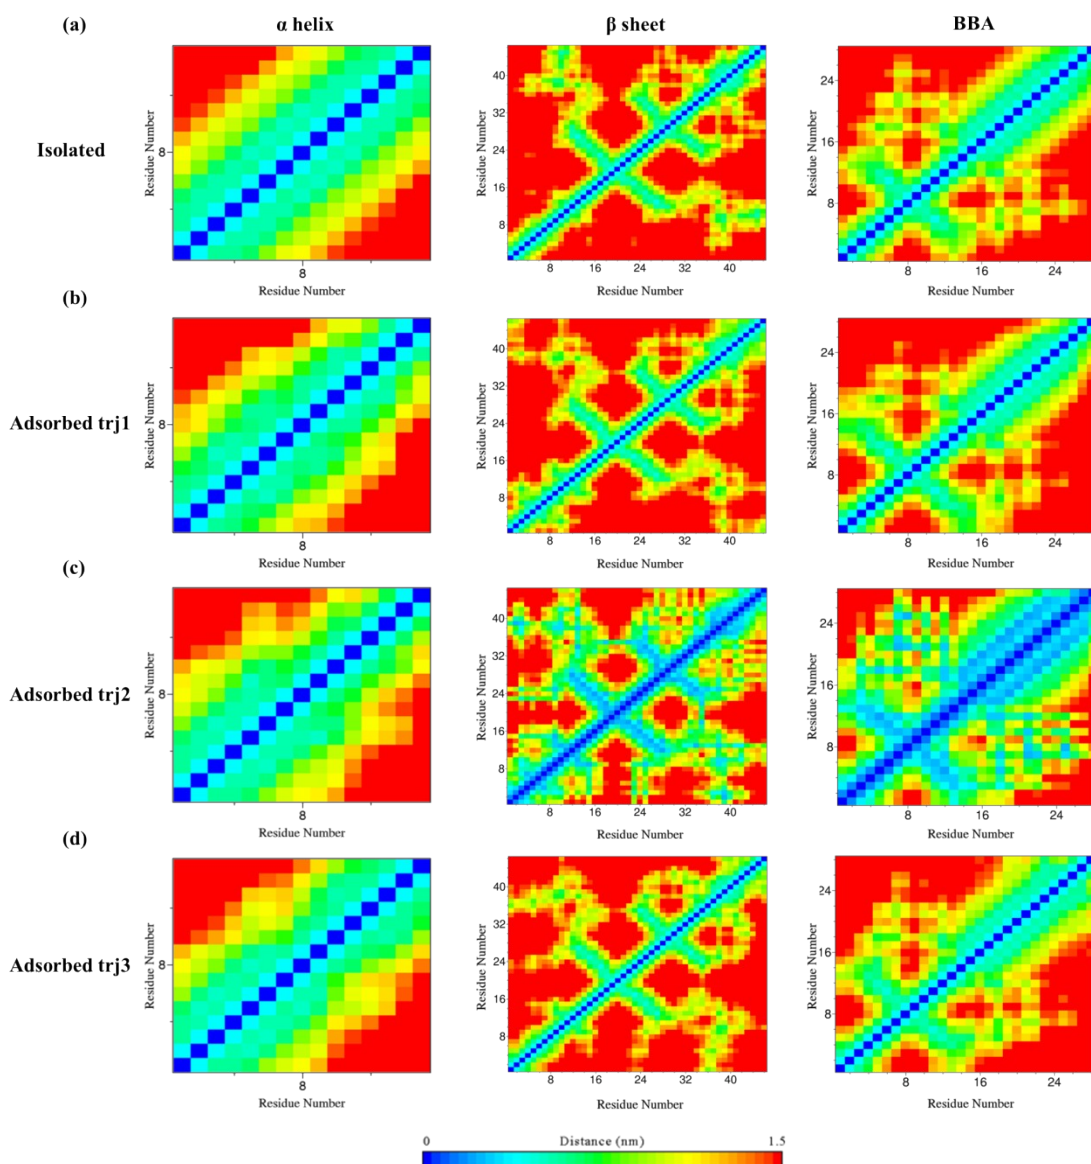

Figure S5. The average distance of C $\alpha$  (c-alpha) atoms of three kinds of protein residues :(a) isolated. (b) orientation 1. (c) orientation 2. (d) orientation 3. Herein, the  $\alpha$  helix in the first column represents  $\lambda_{2-16}$  protein, the  $\beta$  sheet in the second column represents WW domain protein, and the last column represents BBA protein.

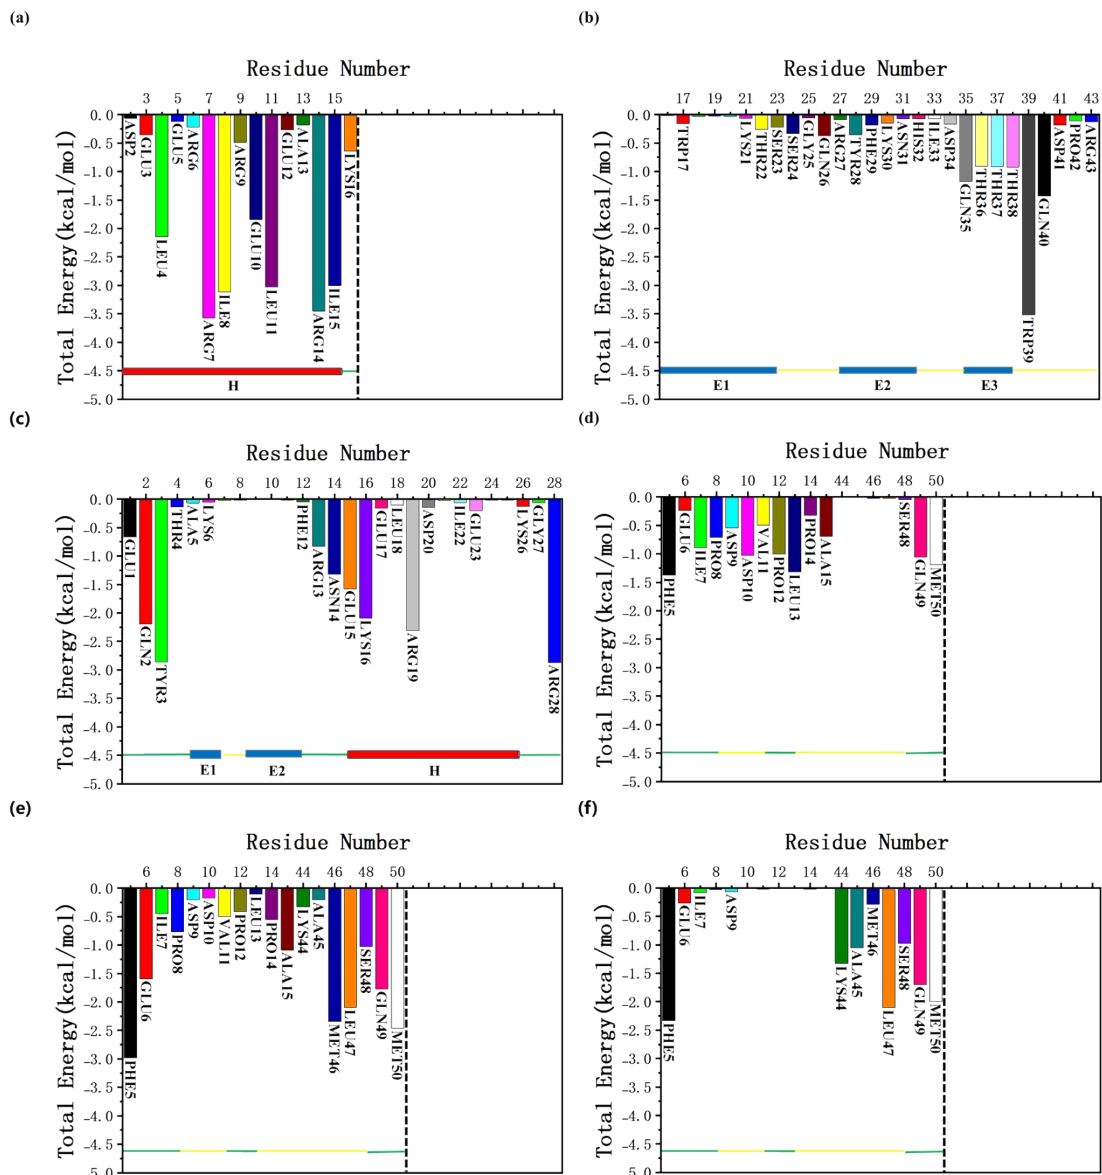

Figure S6. Energy contribution of protein residues to binding free energy in the third initial orientation: (a)  $\lambda_{2-16}$  protein. (b) WW domain protein. (c) BBA protein. Energy contribution of bend and coil region residues in the head and tail of WW domain protein (Non-core  $\beta$ -sheet structure region) to binding free energy: (d) orientation 1 of WW domain protein. (e) orientation 2 of WW domain protein. (f) orientation 3 of WW domain protein.

## References

- [1] Tu Y, Lv M, Xiu P, Huynh T, Zhang M, Castelli M, Liu Z, Huang Q, Fan C, Fang H, Zhou R. Destructive extraction of phospholipids from Escherichia coli membranes by graphene nanosheets. *Nat Nanotechnol.* 2013 Aug; 8(8):594-601.
- [2] Kang JW, Hwang HJ. Comparison of C60 encapsulations into carbon and boron nitride nanotubes. *J Phys. Condensed Matter.* 2004 May 28; 16(23):3901-3908.
- [3] Won CY, Aluru NR. Water permeation through a subnanometer boron nitride nanotube. *J Am Chem Soc.* 2007 Mar 14; 129(10):2748-9.
