# Supplementary figures and images for: Theoretical study of protein adsorption on graphene/h-BN heterostructures
Source: Royal Society of Chemistry journal article supplement (doi:10.1039/d3cp03303a), 2023-01-01

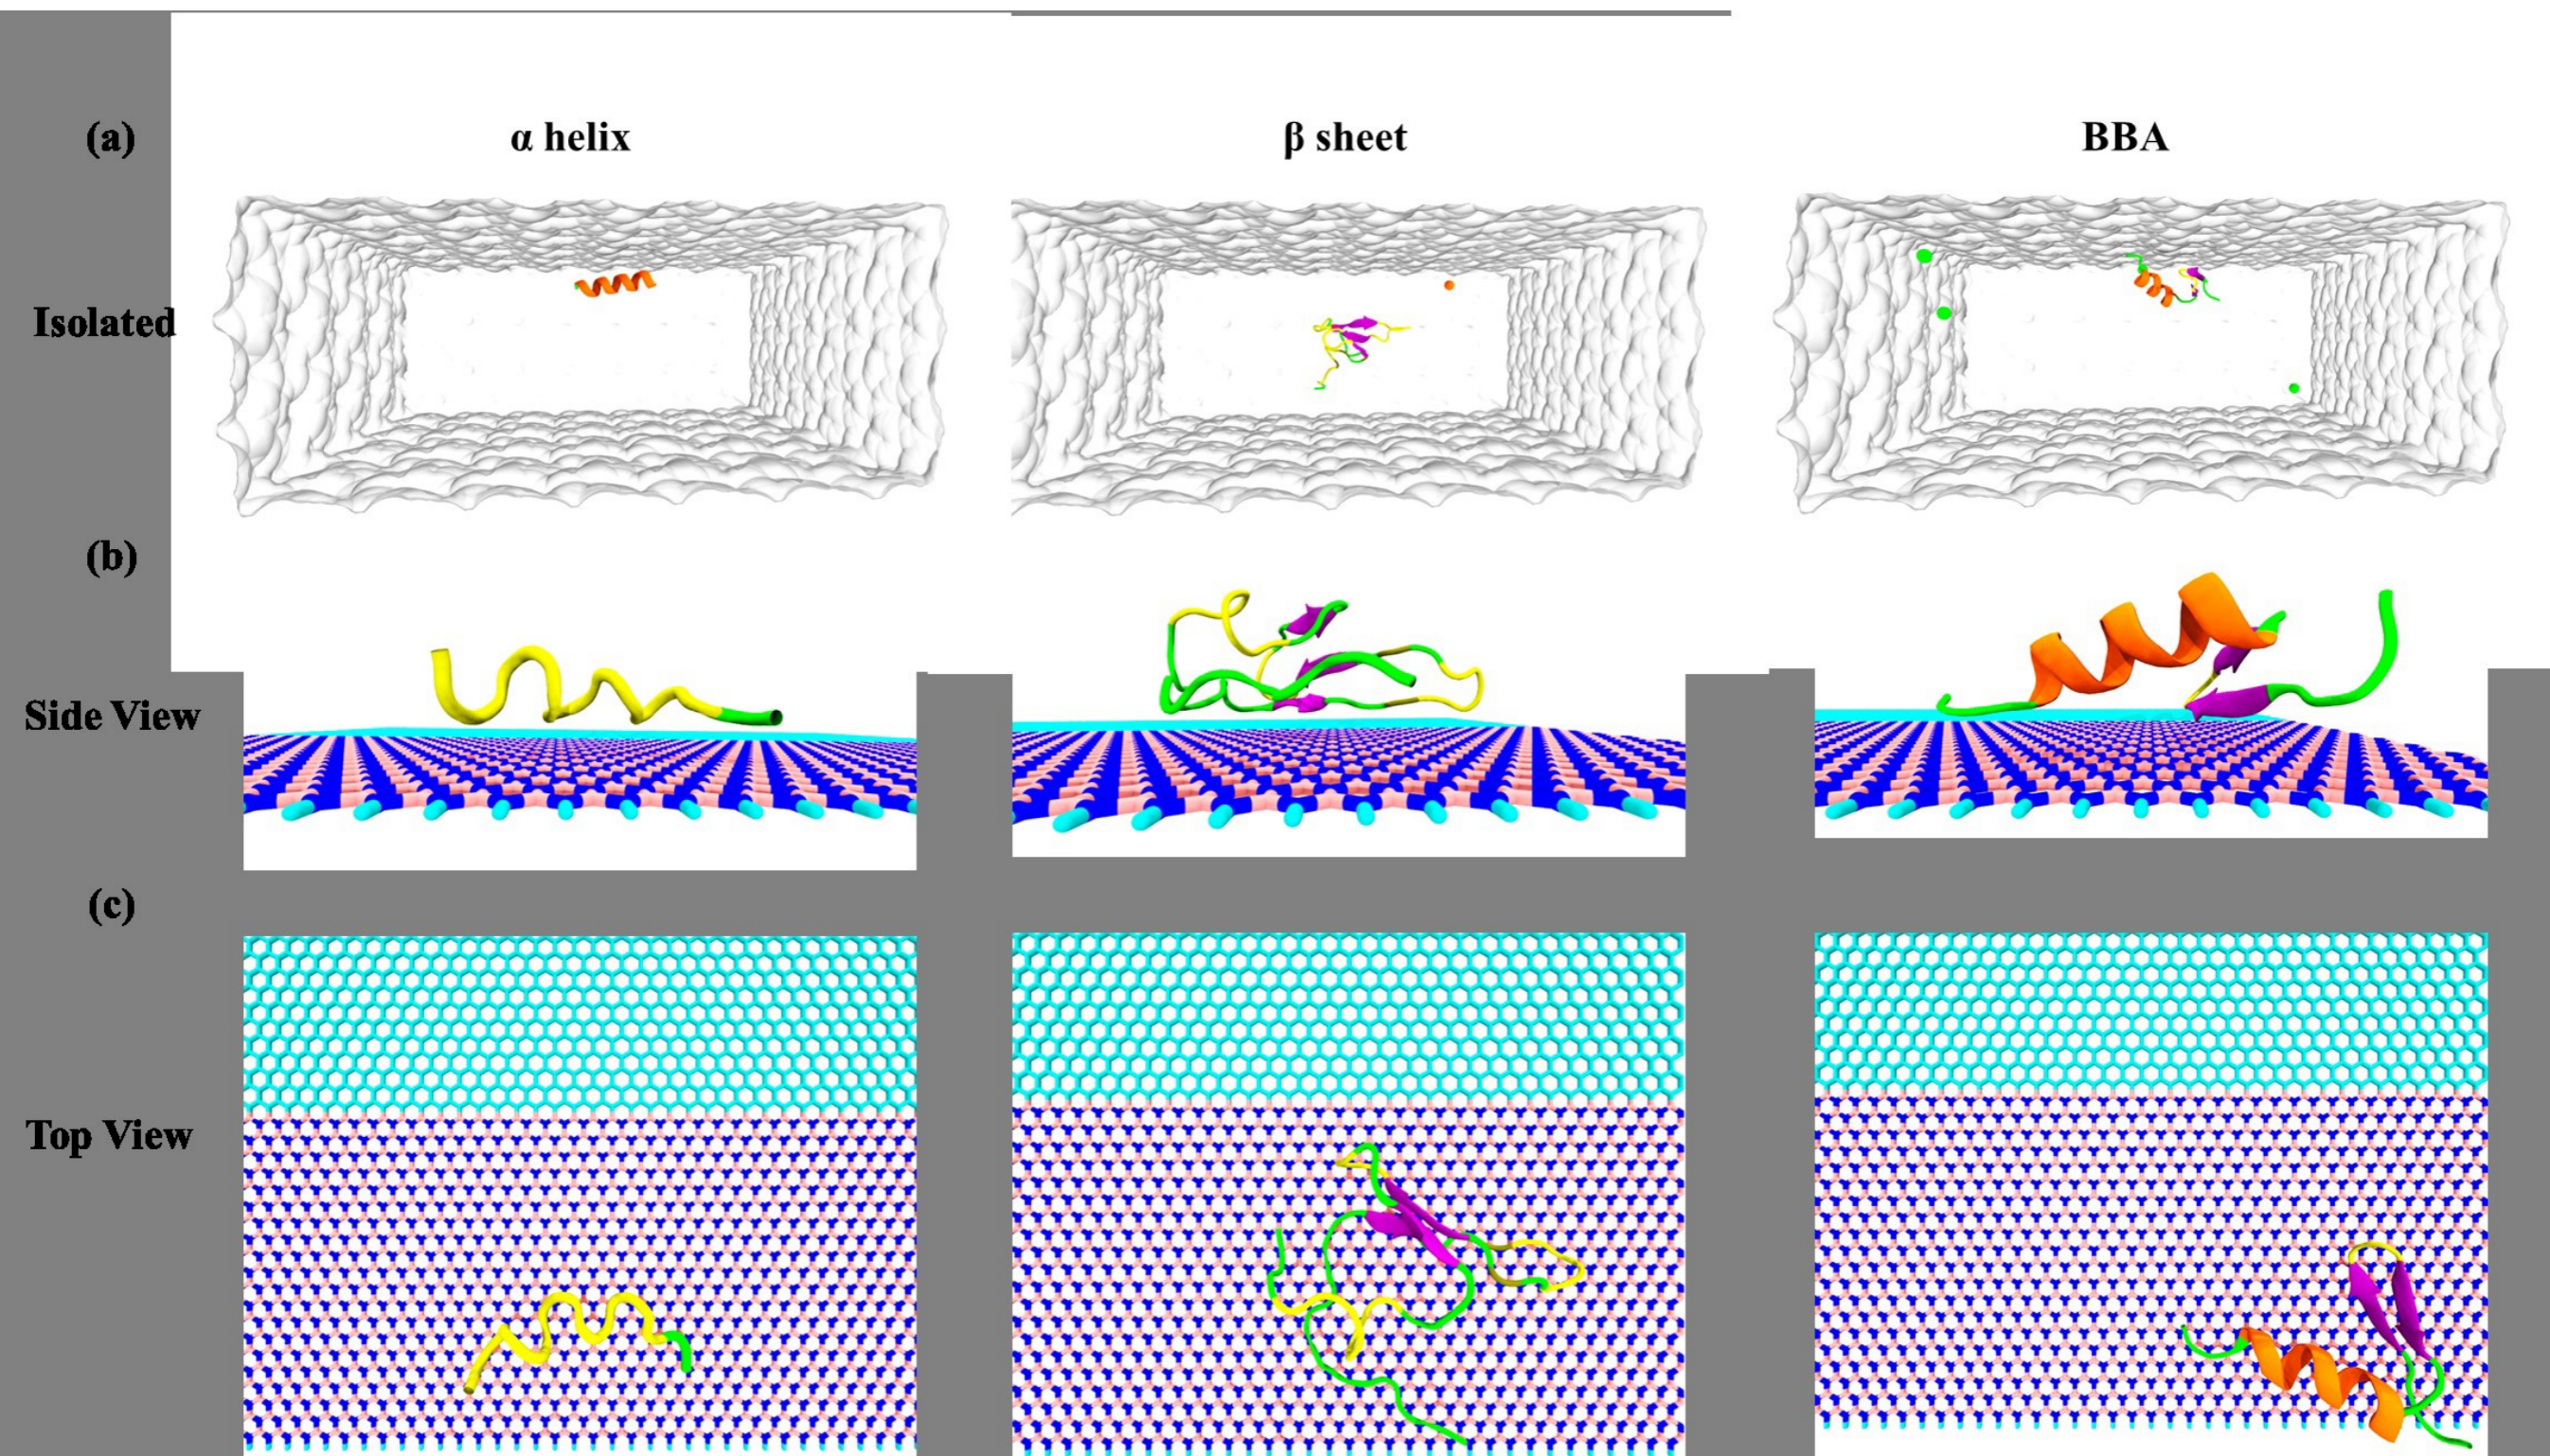

Supplement: d3cp03303a2.pdf [file d3cp03303a2.pdf]

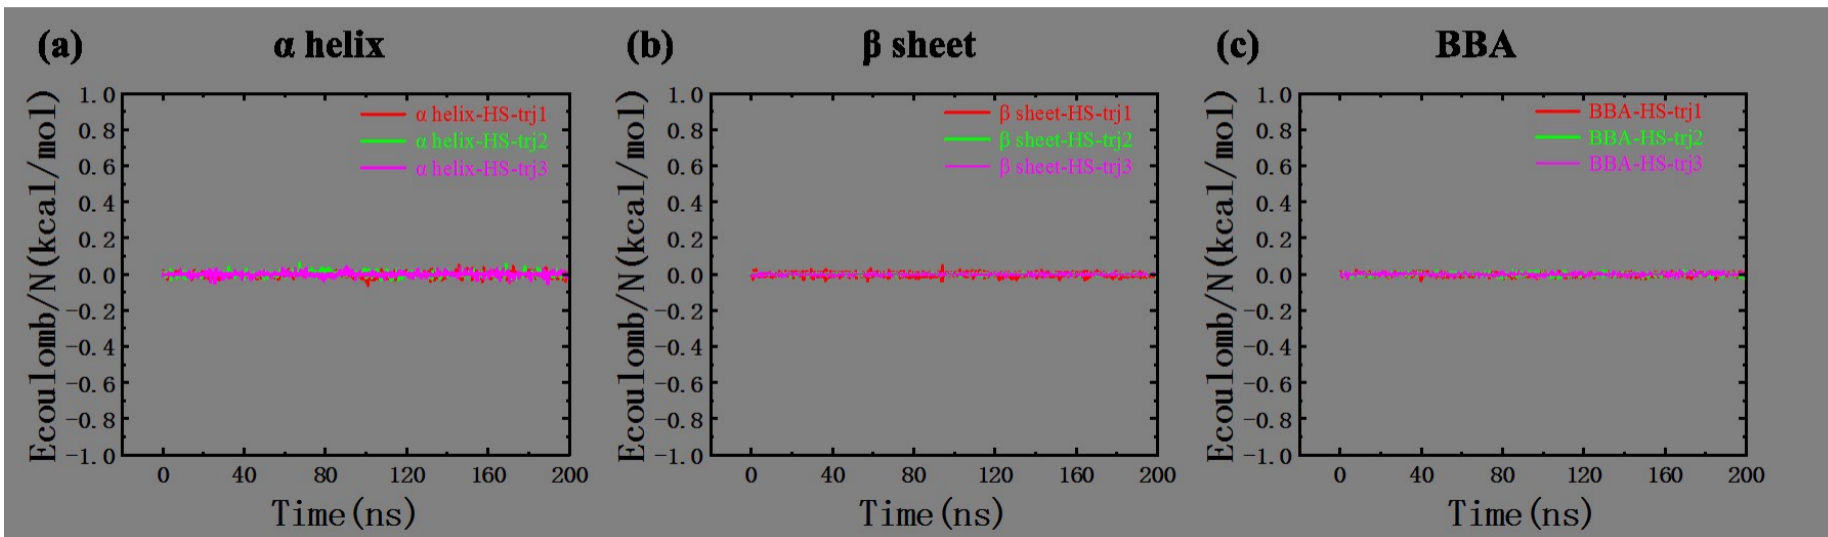

Supplement: d3cp03303a3.pdf [file d3cp03303a3.pdf]

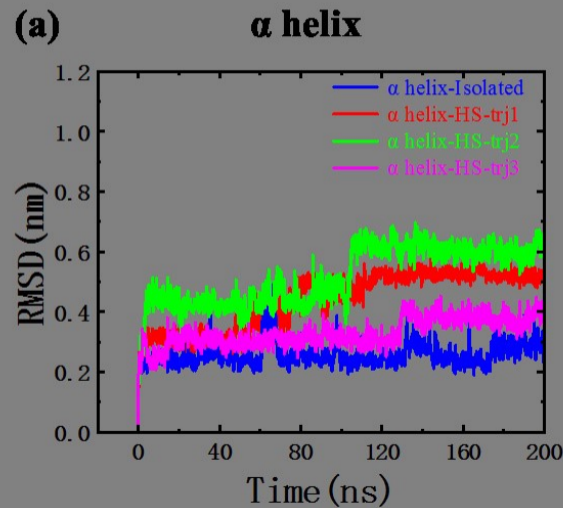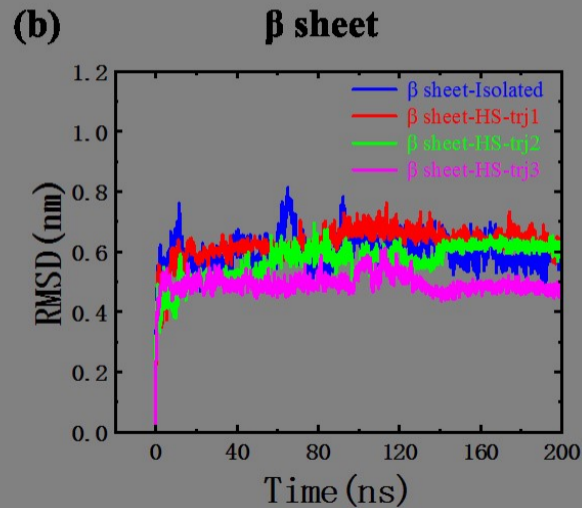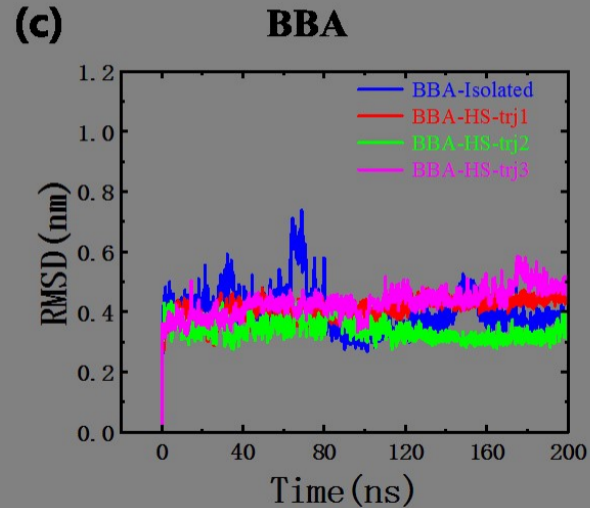

Supplement: d3cp03303a5.pdf [file d3cp03303a5.pdf]

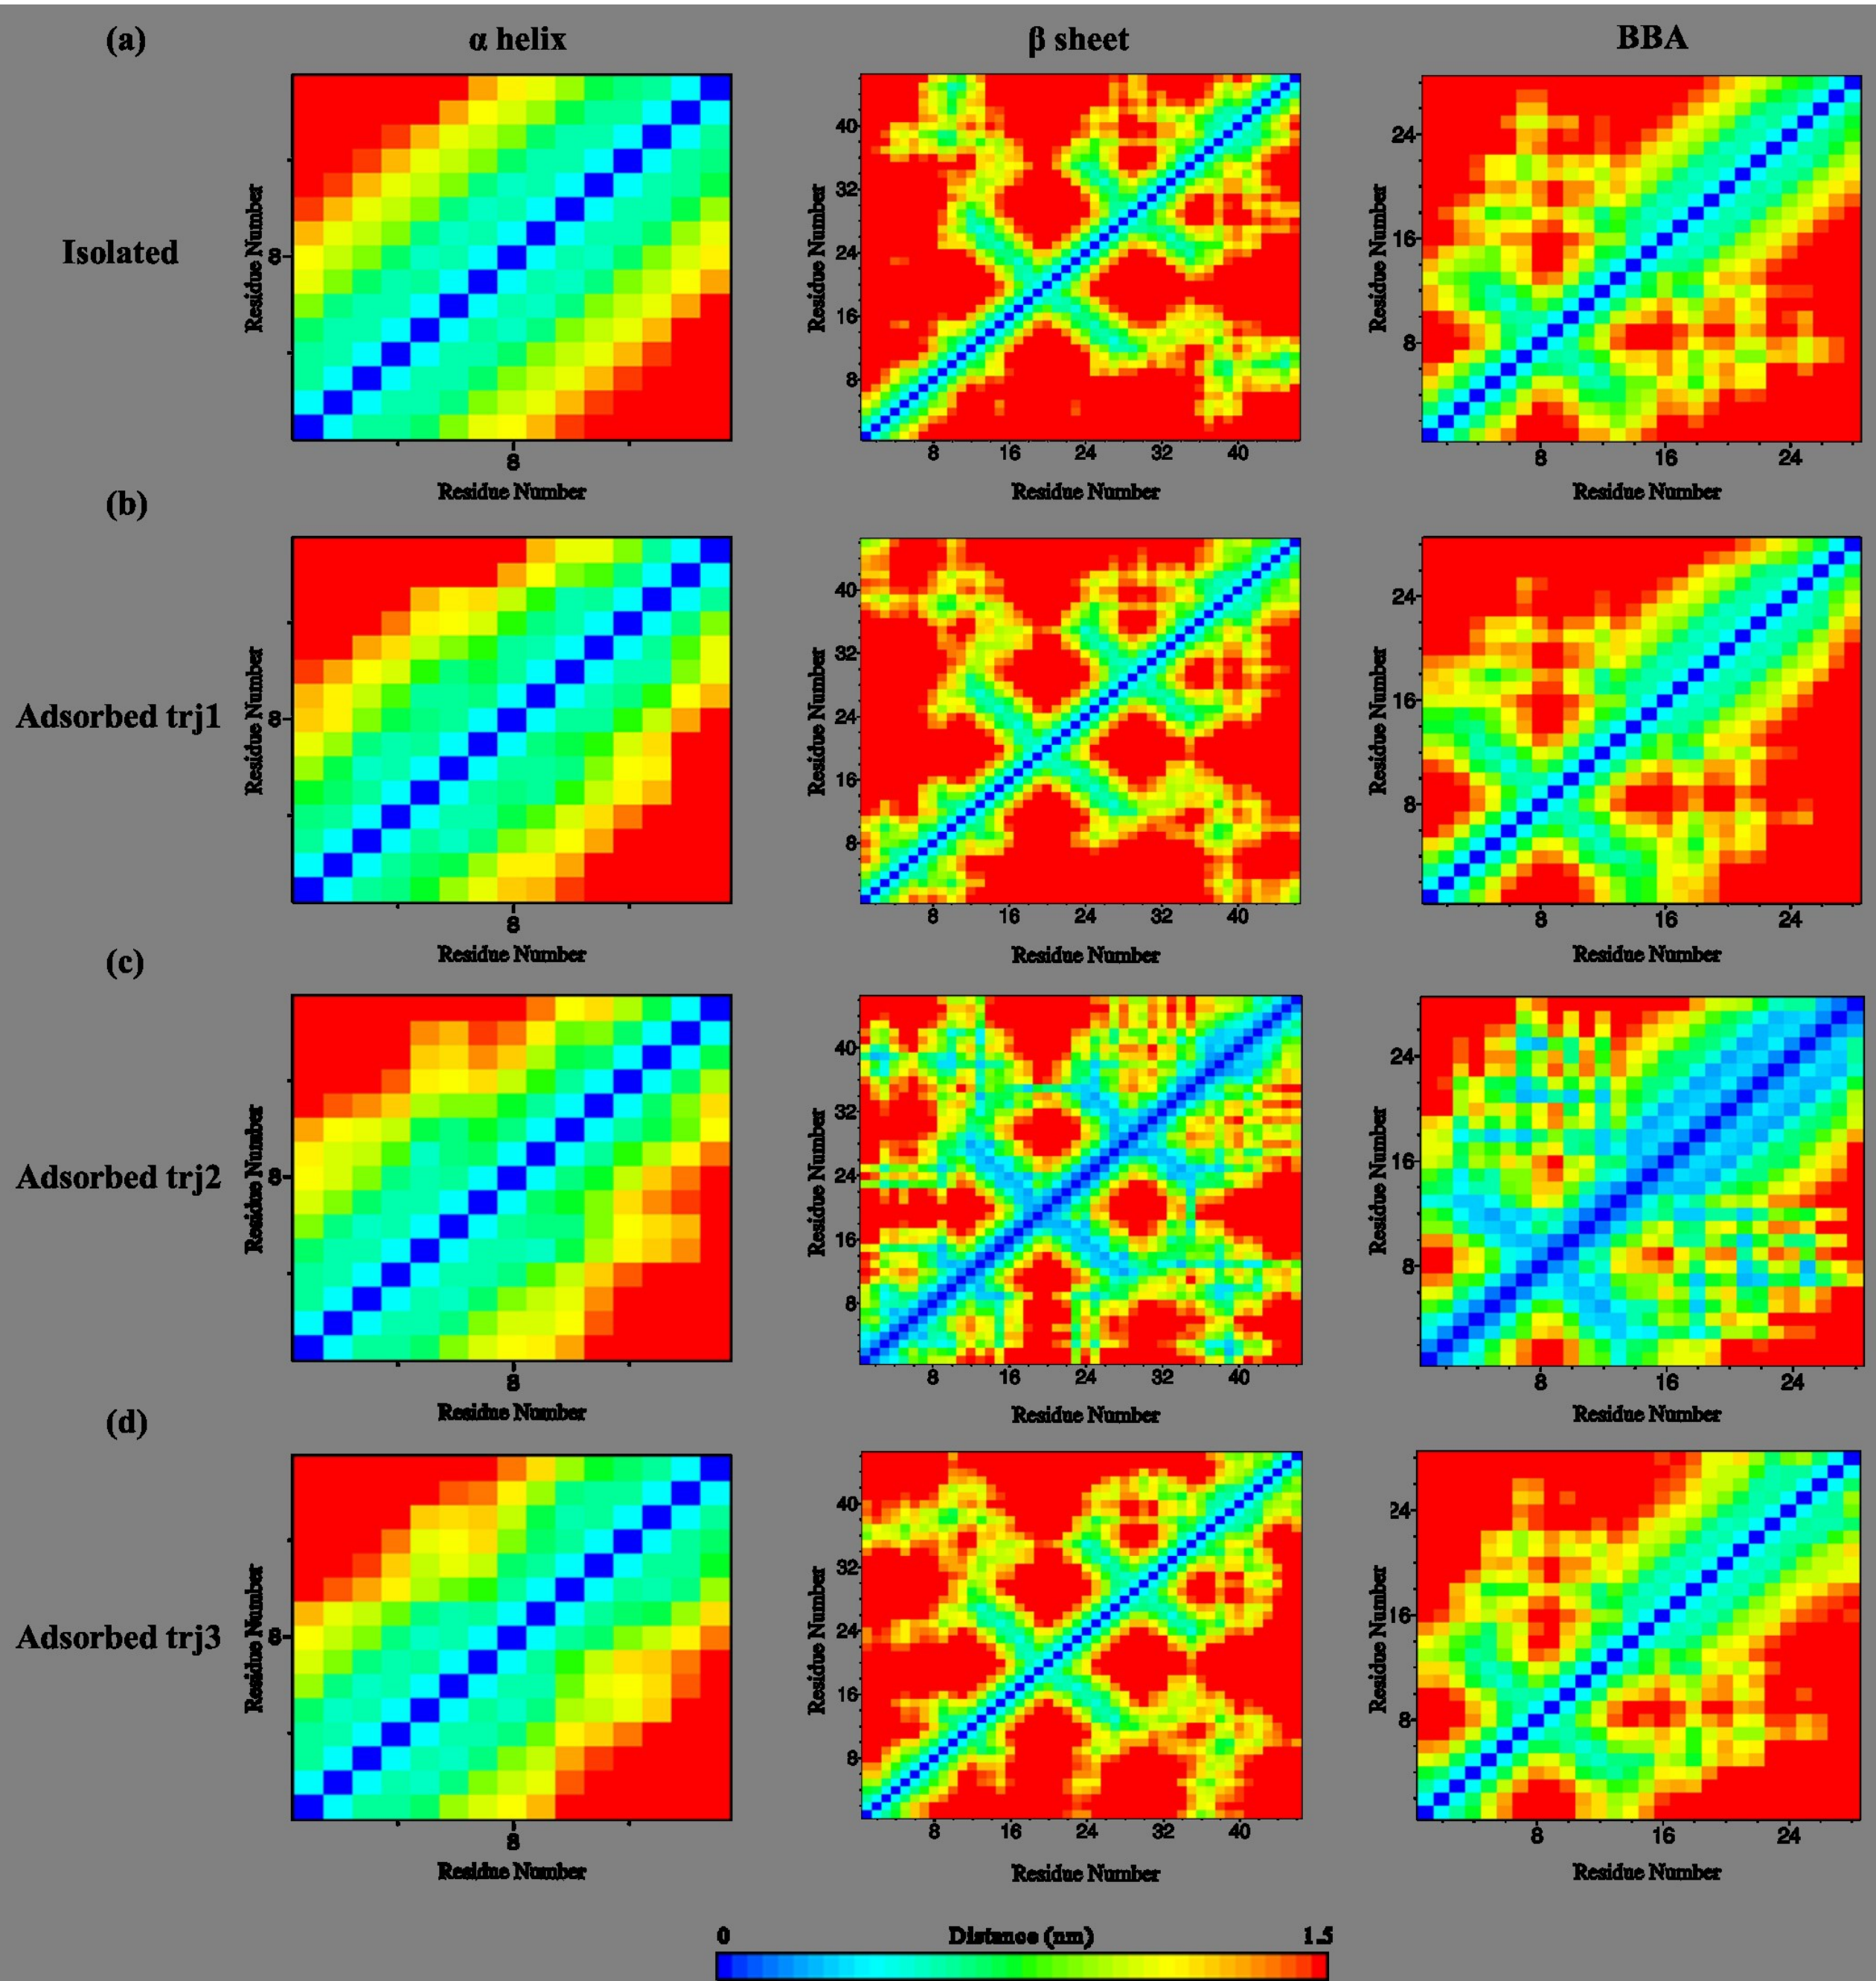

Supplement: d3cp03303a6.pdf [file d3cp03303a6.pdf]
